# Supplementary material
Source: ML conference proceedings conference paper supplement (https://openaccess.thecvf.com/content/CVPR2022/html/Thatipelli_Spatio-Temporal_Relation_Modeling_CVPR_2022_paper.html)
Supplement: Supplementary file 1 [file Thatipelli_Spatio-Temporal_Relation_Modeling_CVPR_2022_supplemental.pdf]

# Spatio-temporal Relation Modeling for Few-shot Action Recognition (Supplementary)

Anirudh Thatipelli<sup>1</sup> Sanath Narayan<sup>2</sup> Salman Khan<sup>1,4</sup>  
Rao Muhammad Anwer<sup>1,3</sup> Fahad Shahbaz Khan<sup>1,5</sup> Bernard Ghanem<sup>6</sup>

<sup>1</sup>Mohamed Bin Zayed University of Artificial Intelligence <sup>2</sup>Inception Institute of Artificial Intelligence <sup>3</sup>Aalto University

<sup>4</sup>Australian National University <sup>5</sup>CVL, Linköping University <sup>6</sup>King Abdullah University of Science & Technology

In this supplementary, we present additional quantitative and qualitative results of our proposed few-shot (FS) action recognition framework, STRM. The quantitative results are discussed in Sec. A1 followed by qualitative analysis in Sec. A2.

## A1. Additional Quantitative Results

**Impact of joint spatio-temporal enrichment:** Tab. A1 shows the impact of replacing our patch-level enrichment (PLE) and frame-level enrichment (FLE) sub-modules in the proposed STRM framework with a joint spatio-temporal (Jnt-ST) enrichment sub-module on the SSv2 [1] dataset. The performance of Baseline TRM is also shown for comparison. Jointly enriching all the spatio-temporal patches across the frames, as in Jnt-ST, does improve the performance over the baseline but with a 50% increase in FLOPs due to computing attention over all the spatio-temporal patches in a video. Although using two layers of Jnt-SA gains over the single layer variant, it requires twice the number of FLOPs than Baseline TRM. Our proposed approach of enriching patches locally within a frame and then enriching the frames globally in a video requires only  $\sim 4\%$  additional FLOPs over the baseline and obtains superior performance. This shows the importance of proposed enrichment mechanism in our STRM framework.

**Impact of varying the enrichment mechanism:** We present the impact of varying the enrichment mechanisms in our PLE and FLE sub-modules in Tab. A2 on the SSv2 dataset. It is worth mentioning that irrespective of the enrichment mechanism employed, integrating PLE and FLE sub-modules enhances the feature discriminability, leading to improved performance over Baseline TRM. However, we observe that employing an MLP-mixer [4] for enriching patches locally within a frame (PLE) or employing self-attention [5] for enriching frames globally across frames in a video (FLE) results in sub-optimal performance. This is because self-attention enriches the tokens locally in a pairwise and sample-dependent manner and is likely to be less

Table A1. **Impact of replacing our PLE and FLE sub-modules with joint spatio-temporal self-attention sub-module on SSv2.** Enriching all the spatio-temporal patches jointly across frames, denoted by Jnt-ST (number of layers shown in parenthesis), improves over Baseline TRM. However, enriching patches spatially at a local level followed by enriching frames temporally at a global level in a hierarchical fashion, as in our STRM, obtains superior performance.

| Baseline TRM | Jnt-ST (1 l) | Jnt-ST (2 l) | Ours : STRM |
|--------------|--------------|--------------|-------------|
| 62.1         | 64.7         | 65.8         | <b>68.1</b> |

Table A2. **Impact of varying the enrichment mechanism in PLE and FLE sub-modules of our STRM on SSv2.** The enrichment mechanism at patch-level and frame-level are varied between self-attention and MLP-mixer based implementations. The performance of Baseline TRM without any PLE and FLE is also shown for comparison. Irrespective of the enrichment mechanism employed, integrating PLE and FLE sub-modules improves over the baseline performance. Employing either MLP-mixer for local patch-level enrichment or self-attention for global frame-level enrichment yields sub-optimal performance. The best performance is obtained by our STRM when self-attention based PLE and MLP-mixer based FLE are integrated in the framework.

|              | PLE            | FLE            | Accuracy    |
|--------------|----------------|----------------|-------------|
| Baseline TRM | -              | -              | 62.1        |
| Ours : STRM  | Self-attention | Self-attention | 64.2        |
|              | MLP-Mixer      | Self-attention | 64.1        |
|              | MLP-Mixer      | MLP-Mixer      | 65.0        |
|              | Self-attention | MLP-Mixer      | <b>68.1</b> |

suitable for enriching the frames at a global level. Similarly, the MLP-mixer is sample-agnostic and enriches the tokens globally through a persistent relationship memory while being less suitable for enriching the patches at a local level.

Thereby, employing self-attention for local patch-level enrichment and simultaneously an MLP-mixer for global frame-level enrichment achieves the best performance and achieves an absolute gain of 6.0% over baseline. These results emphasize the efficacy of enhancing spatio-temporal

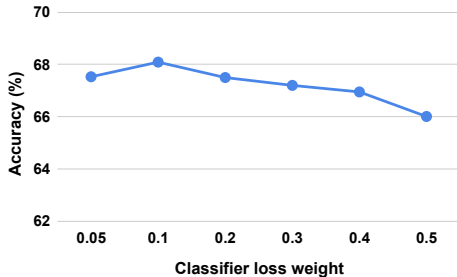

Figure A1. **Impact of varying  $\lambda$  on SSv2.** A low weight for the query-class similarity classification loss yields the best performance for our STRM framework. Training with a large weight ( $> 0.4$ ) for this auxiliary classification loss decreases the importance of modeling temporal relationships in the TRM module and negatively affects the performance.

features by integrating local (sample-dependent) patch-level and global (sample-agnostic) frame-level enrichment along with a query-class similarity classifier in our STRM for the task of FS action recognition.

**Impact of varying  $\lambda$ :** Fig. A1 shows the FS action recognition performance comparison for different values of  $\lambda$ , which is the weight factor for the query-class similarity classification loss in the proposed STRM framework. Setting  $\lambda$  high ( $> 0.4$ ) is likely to decrease the importance of the modeling temporal relationships between query and support actions in the TRM module during training and consequently leads to a drop in performance. Furthermore, we observe that employing this intermediate layer classification loss with a low weight (around 0.1) improves the performance and achieves the best results of 68.1% accuracy for FS action recognition on the SSv2 dataset.

**Class-wise performance gains:** Fig. A2 shows the class-wise gains obtained by the proposed STRM framework over Baseline TRM on the SSv2 dataset. We observe that our STRM achieves gains above 10% for classes such as *Dropping something next to something*, *Showing something next to something*, etc. Out of 24 action classes in the test set, our STRM achieves performance gains on 21 classes. These results show that enriching the features by encoding the spatio-temporal contexts aids in improving the feature discriminability, leading to improved FS action recognition performance.

## A2. Additional Qualitative Results

Here, we present additional qualitative results w.r.t. tuple matching between query and support actions in Fig. A3 to A7. In each example, a query video is shown on the top along with its ground-truth class name. Three query tuples of cardinality two are shown in red, green and blue. Their corresponding best matches in the support videos (of ground-truth action) obtained by Baseline TRM and

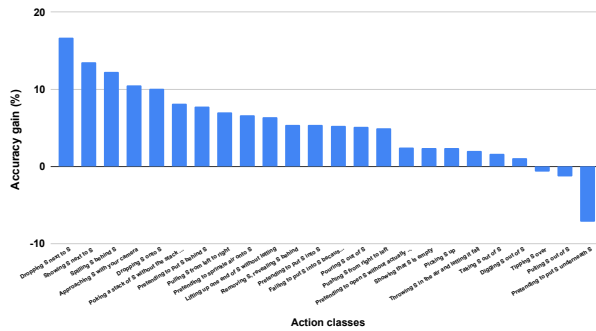

Figure A2. **Performance gains obtained by STRM over Baseline TRM on SSv2 test classes.** Our STRM achieves improved performance over Baseline TRM on 21 out of 24 test action classes in SSv2. Best viewed zoomed in.

our STRM are shown on the left and right, respectively. Generally, we observe that the best matches obtained by Baseline TRM do not encode the same representative features as in the corresponding query tuple. E.g., blue and red tuples in 4<sup>th</sup> and 5<sup>th</sup> support videos of Fig. A3, red and blue tuples in 1<sup>st</sup> and 3<sup>rd</sup> support videos of Fig. A4. These results show that hand-crafted temporal representations in Baseline TRM are likely to not encode class-specific spatio-temporal context at lower cardinalities. In contrast, our STRM obtains best matches that are highly representative of the corresponding query tuples and also encodes longer temporal variations. E.g., green and blue tuples in 4<sup>th</sup> and 5<sup>th</sup> support videos of Fig. A3, blue tuple in 5<sup>th</sup> support video of Fig. A4. The improved tuple matching between query and support actions in STRM is due to the proposed spatio-temporal feature enrichment, comprising patch-level and frame-level enrichment, which enhances the feature discriminability and the learning of the higher-order temporal representations at lower cardinalities that improves the model flexibility. Furthermore, Fig. A8 shows additional attention map visualizations on four example (novel) classes in the SSv2 dataset. Our STRM is able to emphasize the action-relevant objects in the video reasonably well. E.g., in Fig. A8(a), *remote* is emphasized in frames 2, 3 and 7. Similarly, while the *bag*'s position is emphasized in frames 6 and 7, the focus is on the *table* early on, which is required to reason out the *Dropping Something next to Something* action in Fig. A8(c). We also observe that fine-grained novel actions with subtle 2D motion differences are harder to classify, e.g., *Pretending to put Something behind Something* vs. *Pretending to put Something underneath Something*. In general, our STRM learns to emphasize relevant spatio-temporal features that are discriminative, leading to improved FS action recognition performance.

In summary, these quantitative and qualitative results

Query video (*Lifting up one end of something without letting it drop down*)

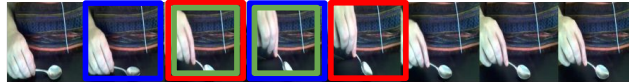

Support set best matches (**Baseline**)

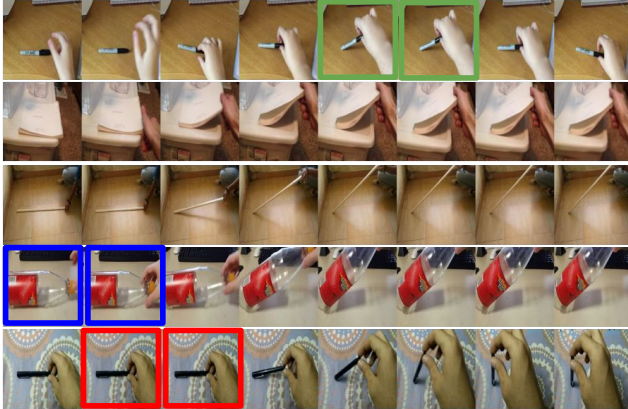

Support set best matches (**STRM**)

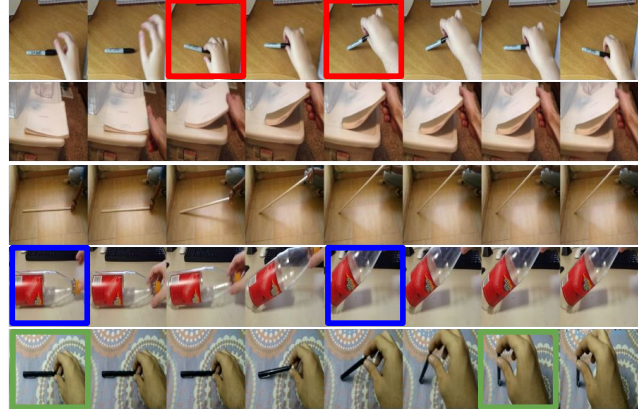

Figure A3. **Qualitative comparison between Baseline TRM and our STRM w.r.t. tuple matches.** Three query tuples of cardinality two are shown in red, green and blue for the query video at the top. Their corresponding best matches in the support videos (of ground-truth action) obtained by Baseline TRM and our STRM are shown on the left and right, respectively. The best matches for the blue and red tuples ( $4^{th}$  and  $5^{th}$  support videos) in Baseline TRM do not encode the action completely and are less discriminative. We observe that our STRM is able to capture better matches with longer temporal variations (green and blue tuples in  $4^{th}$  and  $5^{th}$  support videos) due to the learned higher order temporal representations. See Sec. A2 for additional details.

Query video (*Pretending to open something without actually opening it*)

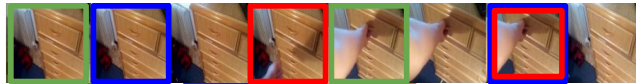

Support set best matches (**Baseline**)

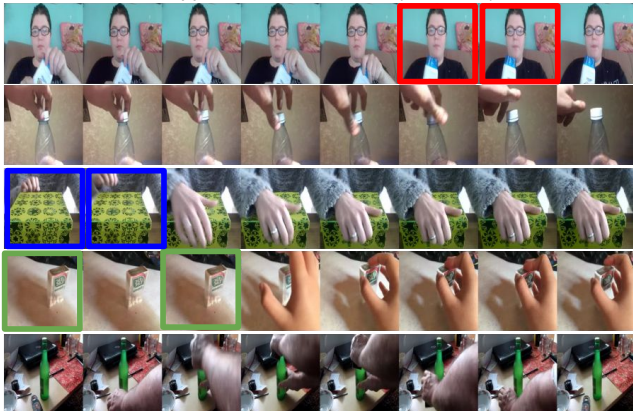

Support set best matches (**STRM**)

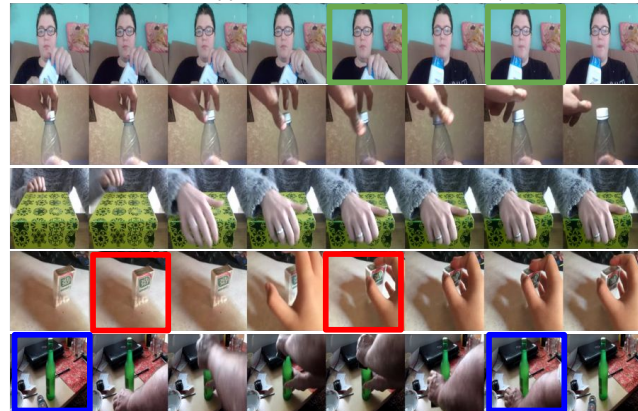

Figure A4. **Qualitative comparison between Baseline TRM and our STRM w.r.t. tuple matches.** See Fig. A3 and Sec. A2 for additional details. The best matches for red and blue query tuples obtained by STRM ( $4^{th}$  and  $5^{th}$  support videos) are better representatives of the corresponding query tuples, in comparison to the best matches found by Baseline TRM ( $1^{st}$  and  $3^{rd}$  support videos).

along with the comprehensive experiments performed (main paper) emphasize the benefits of our proposed spatio-temporal enrichment module in enhancing feature discriminability and model flexibility, leading to improved few-shot action recognition.

### A3. Societal Impact and Future Direction

Automated understanding of human actions from videos, when deployed responsibly, can be useful in multiple applications. Examples include human-robotic interaction in elderly care facilities, where robots need to process human



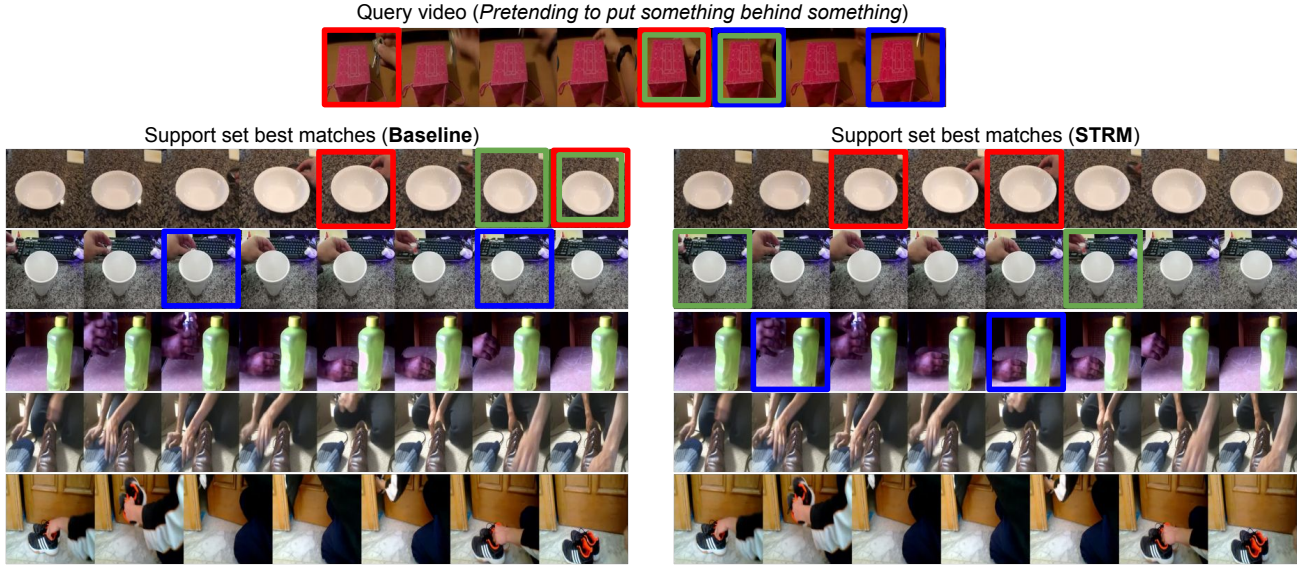

Figure A5. **Qualitative comparison between Baseline TRM and our STRM w.r.t. tuple matches.** See Fig. A3 and Sec. A2 for additional details. For the query tuple in green, the best match obtained by our STRM ( $2^{nd}$  support video) is a better representative, in comparison to the best match of Baseline TRM ( $1^{st}$  support video).

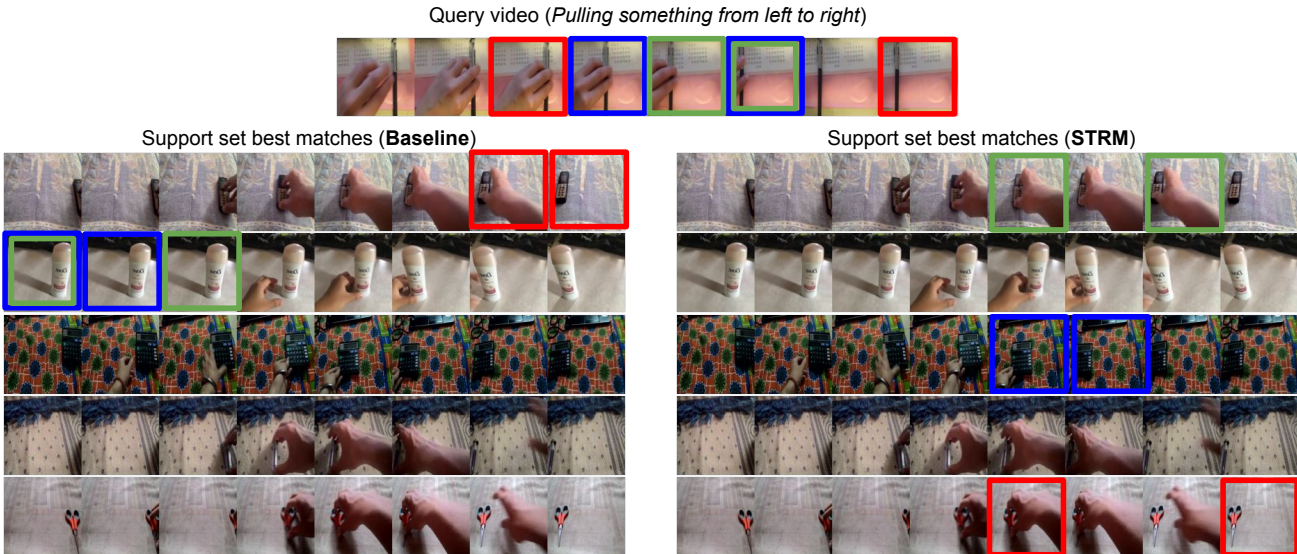

Figure A6. **Qualitative comparison between Baseline TRM and our STRM w.r.t. tuple matches.** See Fig. A3 and Sec. A2 for additional details. The best matches found by Baseline TRM ( $2^{nd}$  support video) for the green and blue query tuples fail to encode the true motion occurring in the corresponding query tuples. This is mitigated in the best matches obtained by our STRM.

actions to effectively assist them. Other applications include behavior analysis for mental-health counseling and athletic rehabilitation. However, if deployed irresponsibly, automated action recognition techniques can be used to retrieve or summarize sensitive clips that breach individual privacy, similar to most computer vision research problems. A likely future work direction, beyond the scope of our cur-

rent work, is to broaden the few-shot action recognition capability to generalize across varying domains.

#### A4. Additional Implementation Details

The input videos are rescaled to a height of 256 and  $L=8$  frames are uniformly sampled, as in [3]. Random  $224 \times 224$  crops are used as augmentation during training. In contrast,

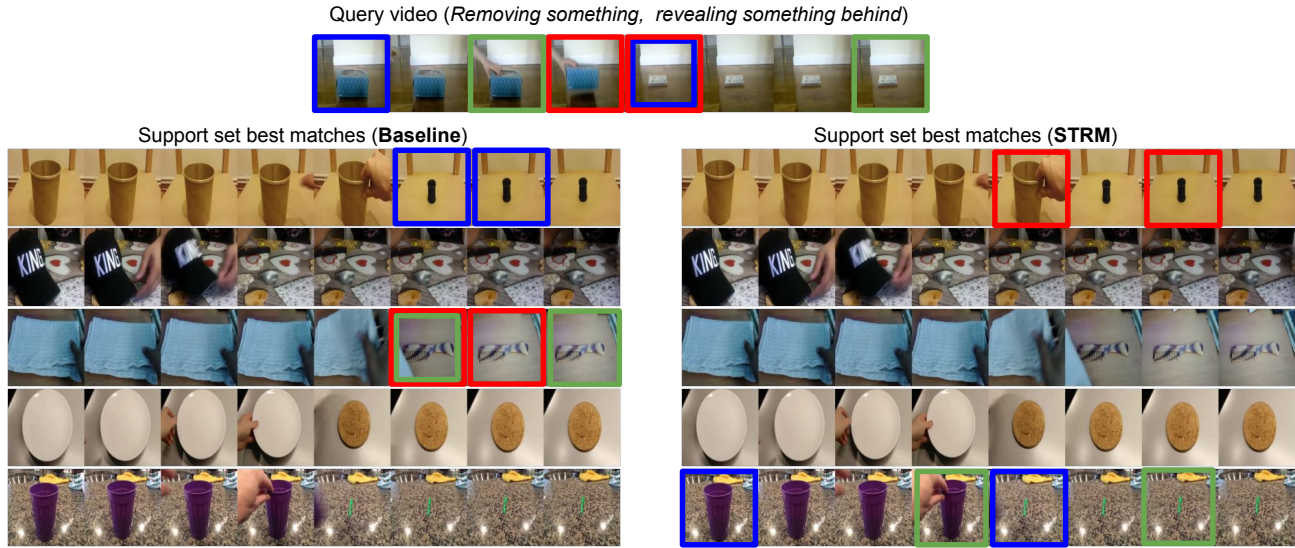

Figure A7. **Qualitative comparison between Baseline TRM and our STRM w.r.t. tuple matches.** See Fig. A3 and Sec. A2 for additional details. The Baseline TRM fails to obtain support tuples that are representative enough for the query tuples in red and green. Our STRM alleviates this issue and obtains good representative matches (1<sup>st</sup> and 5<sup>th</sup> support videos) since it enhances the feature discriminability through patch-level as well as frame-level enrichment and learns higher-order temporal representations.

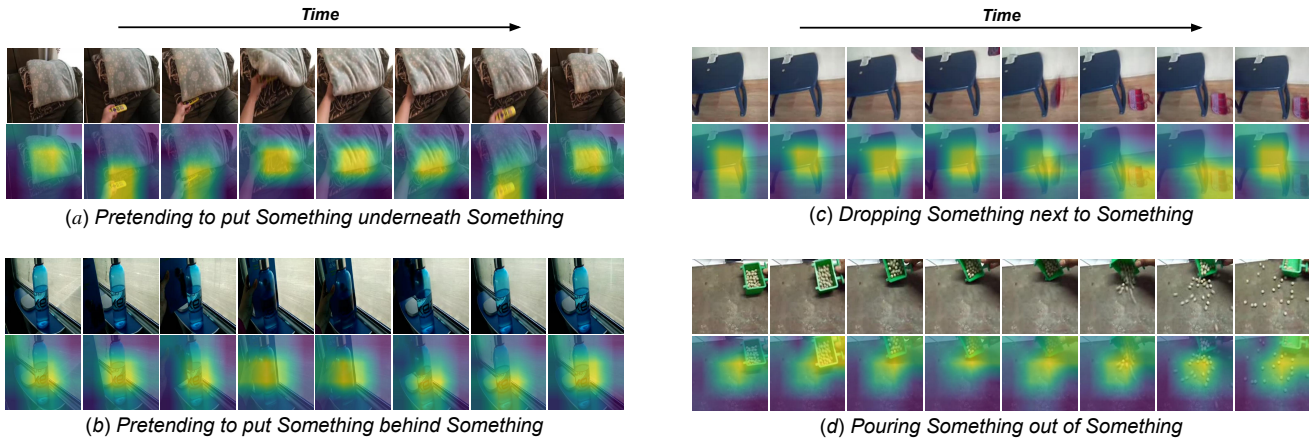

Figure A8. **Attention map visualization for four example classes in SSV2.** Our STRM learns to emphasize relevant spatio-temporal features that are discriminative, leading to improved FS action recognition performance. For instance, relevant objects for corresponding actions are emphasized: *remote* in frames 2, 3 and 7 in (a), *gems* in frames 4, 6, 7 and 8 in (d), respectively. Similarly, in (c), the focus on the *table* early on shifts to the *bag*'s position in frames 6 and 7, which is required to reason out the *Dropping Something next to Something* action.

only a centre crop is used during evaluation. We use the PyTorch [2] library to train our STRM framework on four NVIDIA 2080Ti GPUs. Since only a single few-shot task can fit in the memory, the gradients are accumulated and backpropagated once every 16 iterations.

## References

[1] Raghav Goyal, Samira Ebrahimi Kahou, Vincent Michalski, Joanna Materzynska, Susanne Westphal, Heuna Kim, Valentin

Haanel, Ingo Freund, Peter Yianilos, Moritz Mueller-Freitag, Florian Hoppe, Christian Thureau, Ingo Bax, and Roland Memisevic. The "something something" video database for learning and evaluating visual common sense. In *ICCV*, 2017. 1

[2] Adam Paszke, Sam Gross, Francisco Massa, Adam Lerer, James Bradbury, Gregory Chanan, Trevor Killeen, Zeming Lin, Natalia Gimelshein, Luca Antiga, et al. Pytorch: An imperative style, high-performance deep learning library. In *NeurIPS*, 2019. 5

- [3] Toby Perrett, Alessandro Masullo, Tilo Burghardt, Majid Mirmehdi, and Dima Damen. Temporal-relational crosstransformers for few-shot action recognition. In *CVPR*, 2021. [4](#)
- [4] Ilya Tolstikhin, Neil Houlsby, Alexander Kolesnikov, Lucas Beyer, Xiaohua Zhai, Thomas Unterthiner, Jessica Yung, Andreas Steiner, Daniel Keysers, Jakob Uszkoreit, et al. Mlp-mixer: An all-mlp architecture for vision. *arXiv preprint arXiv:2105.01601*, 2021. [1](#)
- [5] Ashish Vaswani, Noam Shazeer, Niki Parmar, Jakob Uszkoreit, Llion Jones, Aidan N Gomez, Łukasz Kaiser, and Illia Polosukhin. Attention is all you need. In *NeurIPS*, 2017. [1](#)
